# Supplementary material for: Comprehensive analysis of immunoglobulin expression in the mouse brain from embryonic to adult stages
Source: Research Square preprint supplement (doi:10.21203/rs.3.rs-5901516/v1), 2025-04-17
Supplement: Supplementary file 1 [file 04231fc6abddc20a0e503063.pdf]

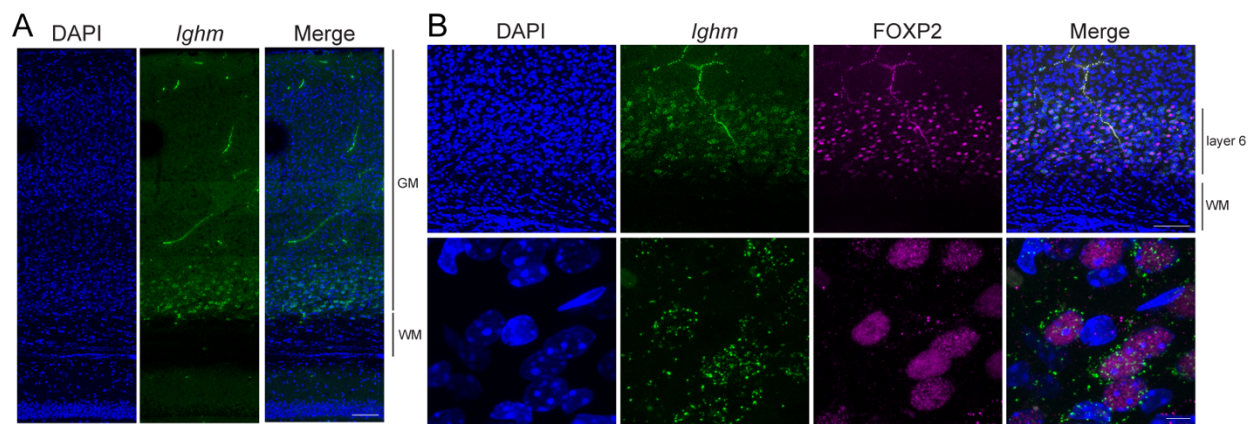

**Supplementary Figure 1 | *In situ* hybridization for *Ighm* in the adult cerebral cortex.**

A. *In situ* hybridization for *Ighm* on a section of cerebral cortex from 8W mouse. Scale bar = 75  $\mu$ m. B. *In situ* hybridization for *Ighm* combined with IHC for FOXP2 on 8W mouse cerebral cortex. FOXP2-positive corticothalamic neurons in layer 6 express *Ighm*. Bottom panel is the magnification of the top panel. Scale bar = 75  $\mu$ m (top panel), 5  $\mu$ m (bottom panel). WM: white matter, GM: gray matter. n = 4 brains.

Astro tSNE plot

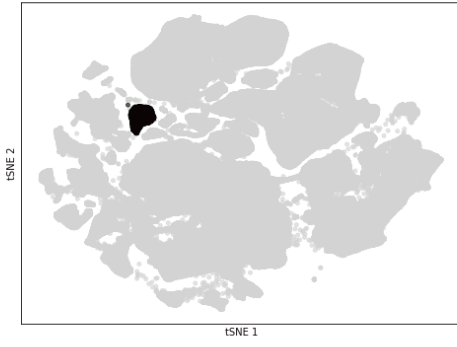

CA1-ProS tSNE plot

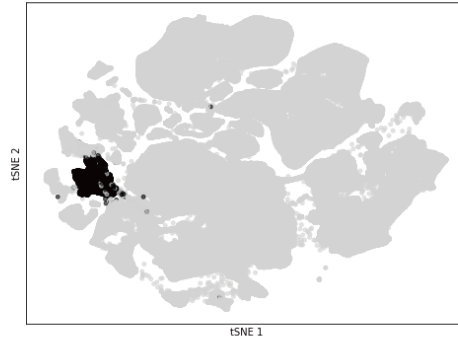

CA2-IG-FC tSNE plot

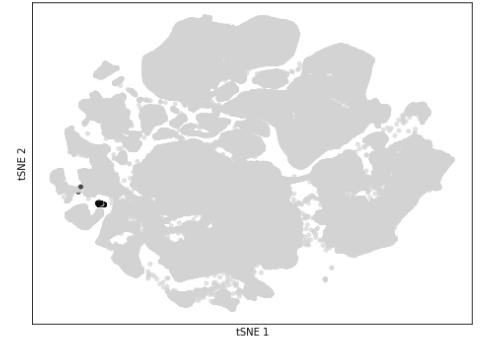

CA3 tSNE plot

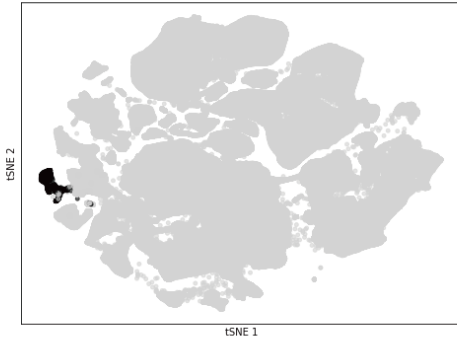

Car3 tSNE plot

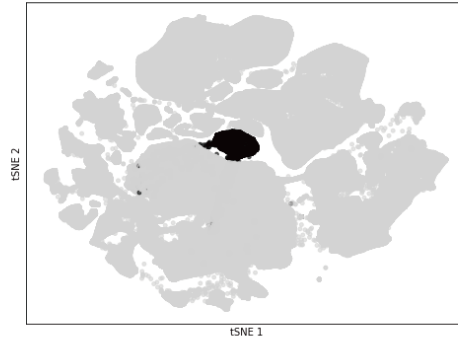

CR tSNE plot

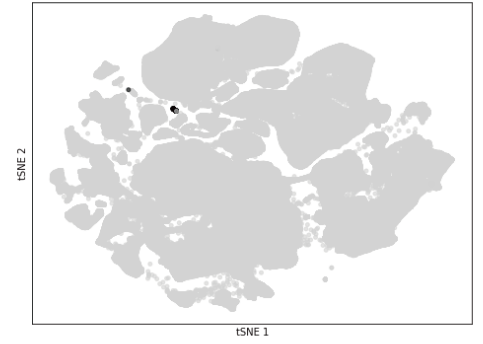

CT SUB tSNE plot

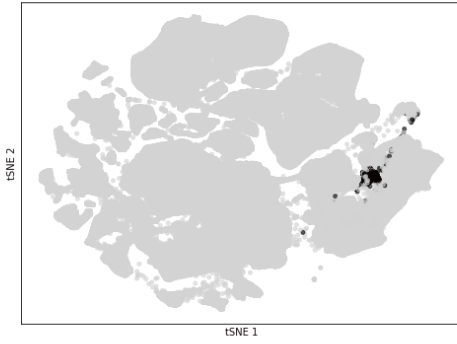

DG tSNE plot

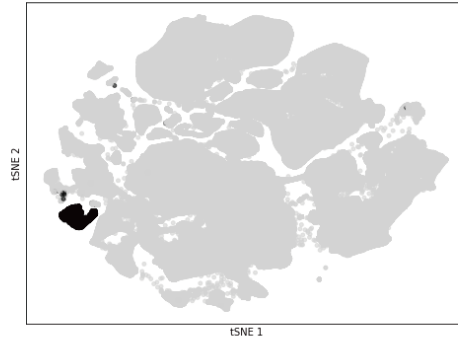

Endo tSNE plot

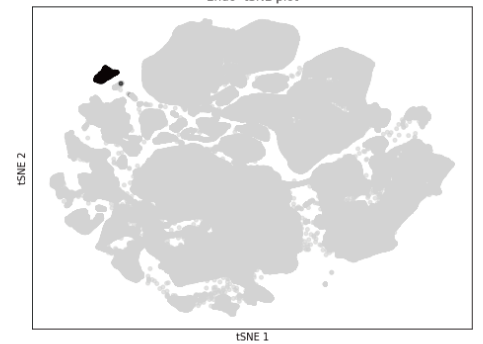

L2 IT ENT1 tSNE plot

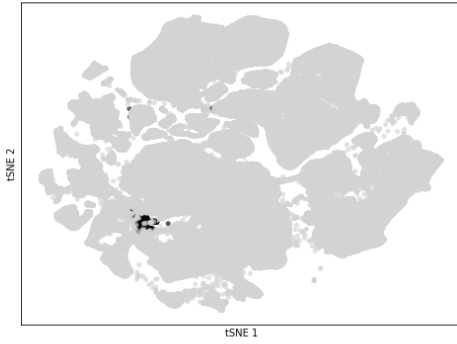

L2 IT ENTm tSNE plot

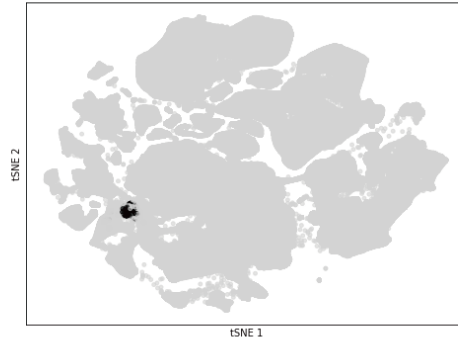

L2/3 IT CTX tSNE plot

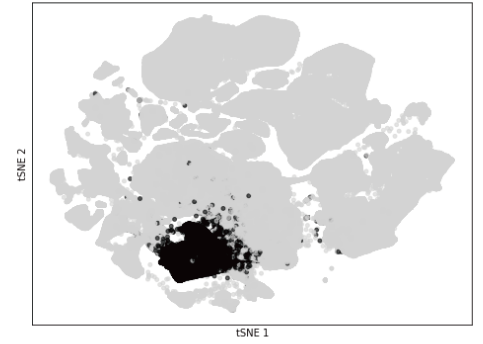

L2/3 IT ENT1 tSNE plot

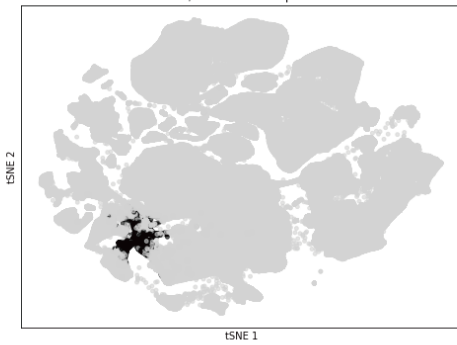

L2/3 IT PPP tSNE plot

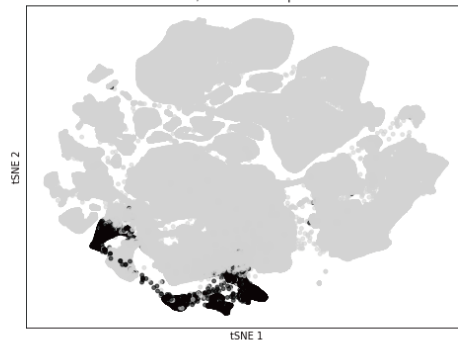

L2/3 IT RHP tSNE plot

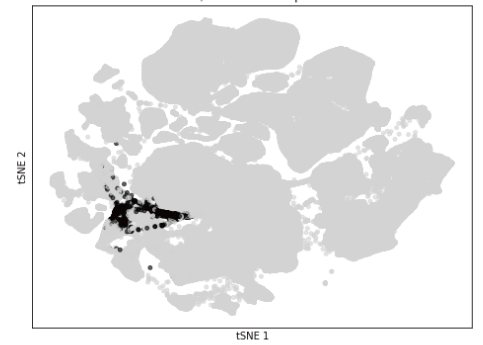

L3 IT ENT tSNE plot

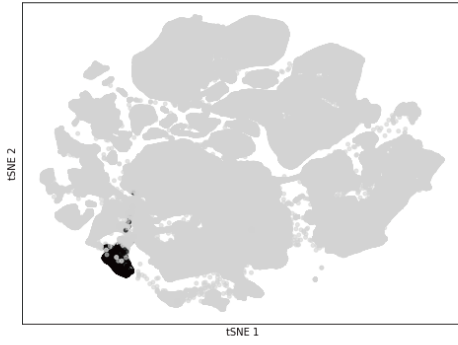

L4 RSP-ACA tSNE plot

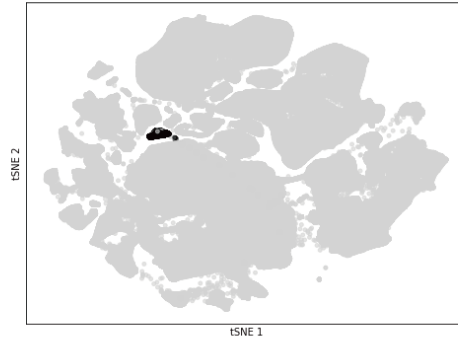

L4/5 IT CTX tSNE plot

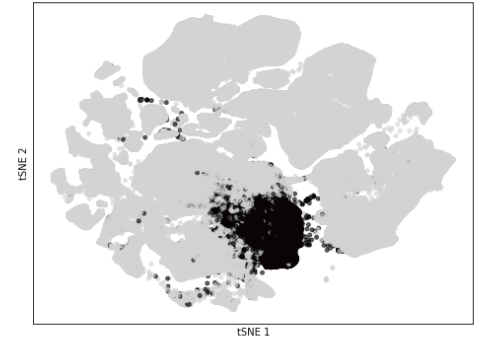

L5 IT CTX tSNE plot

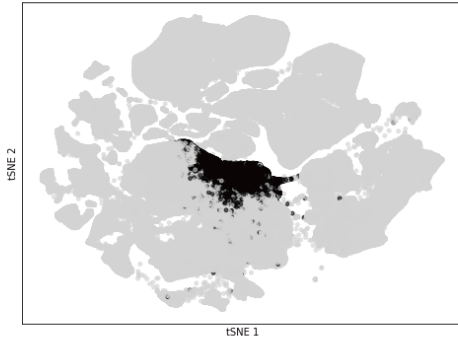

L5 PPP tSNE plot

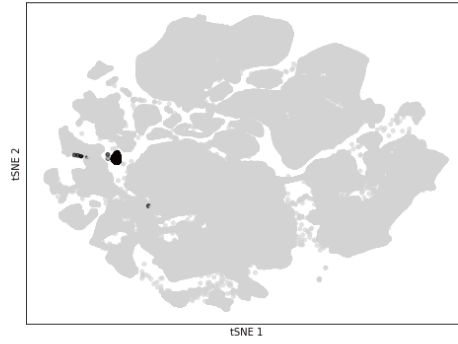

L5 PT CTX tSNE plot

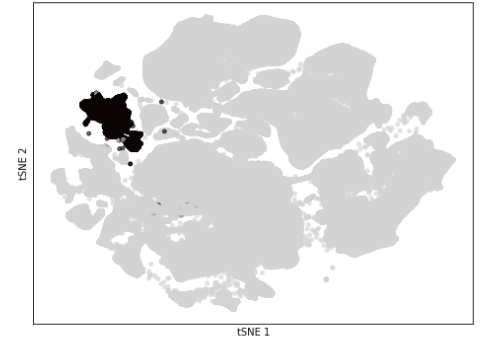

L5/6 IT TPE-ENT tSNE plot

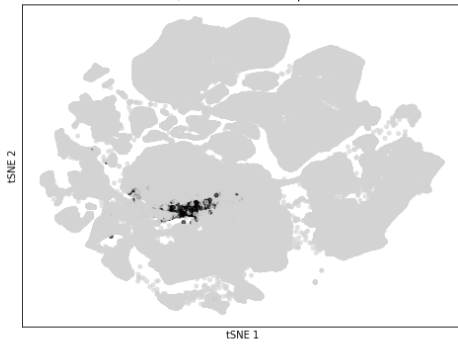

L5/6 NP CTX tSNE plot

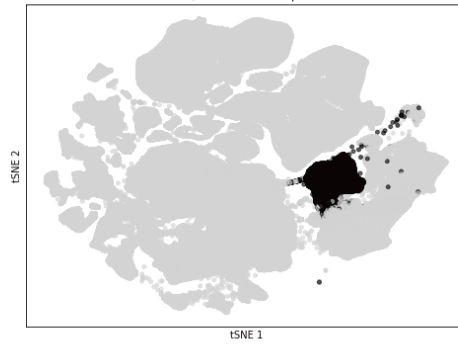

L6 CT CTX tSNE plot

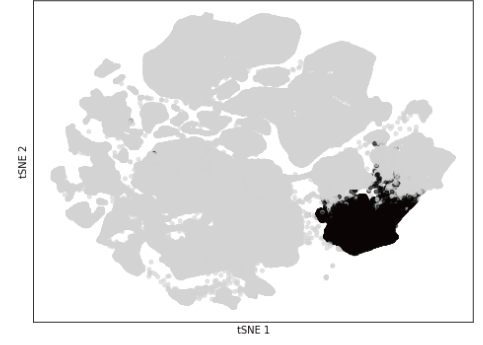

L6 IT CTX tSNE plot

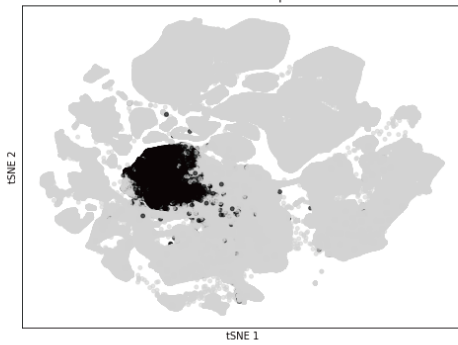

L6 IT ENT1 tSNE plot

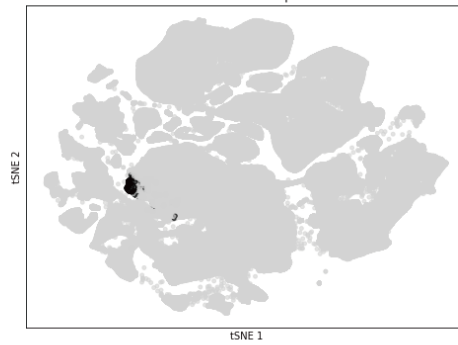

L6b CTX tSNE plot

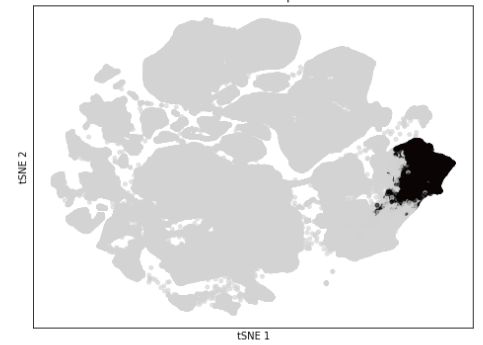

L6b/CT ENT tSNE plot

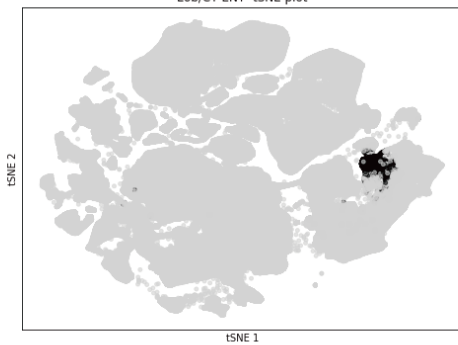

Lamp5 tSNE plot

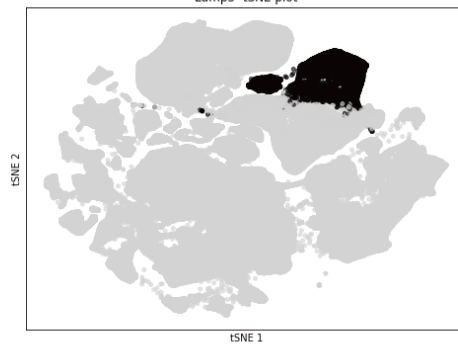

Meis2 tSNE plot

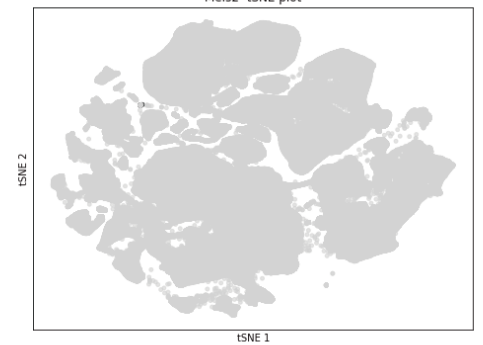

Micro-PVM tsNE plot

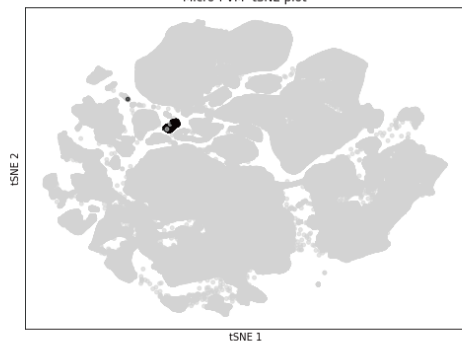

NP PPP tsNE plot

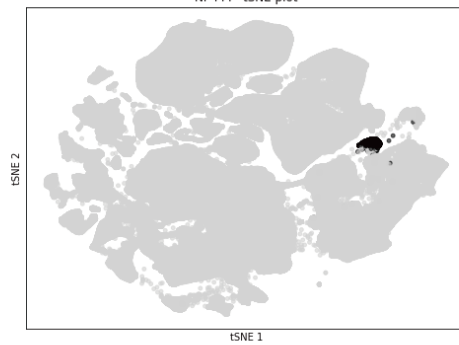

NP SUB tsNE plot

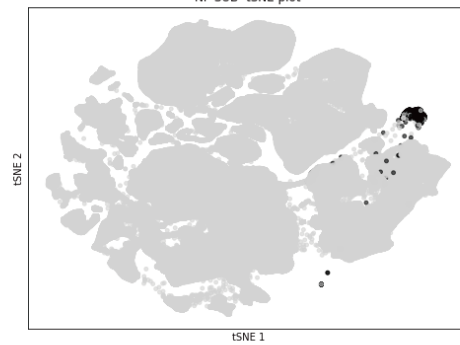

Oligo tsNE plot

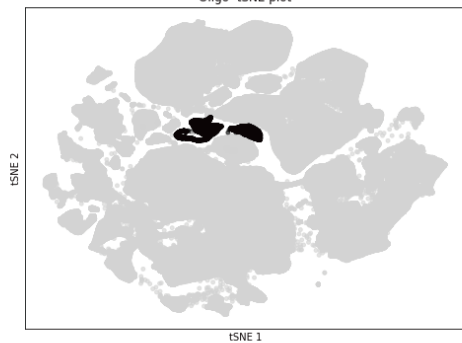

Pvalb tsNE plot

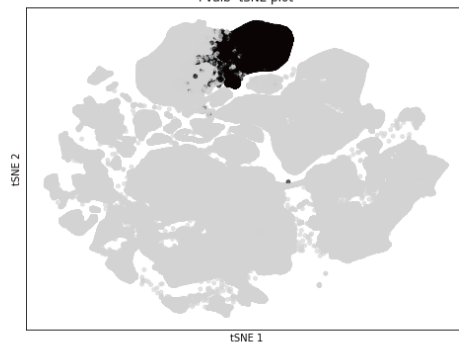

SMC-Peri tsNE plot

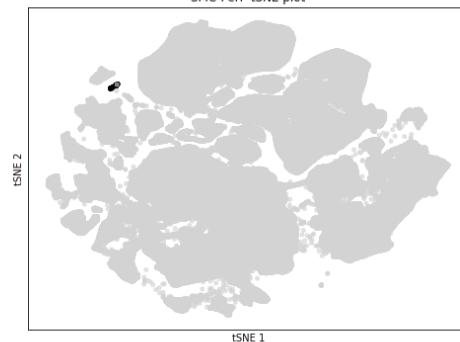

Sncg tsNE plot

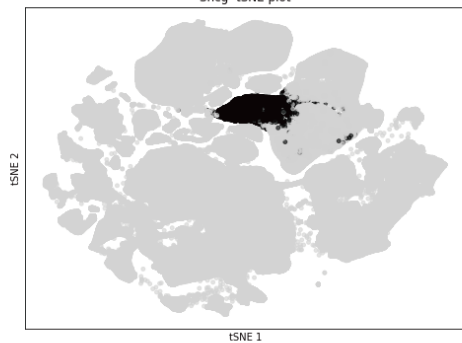

Sst Chodl tsNE plot

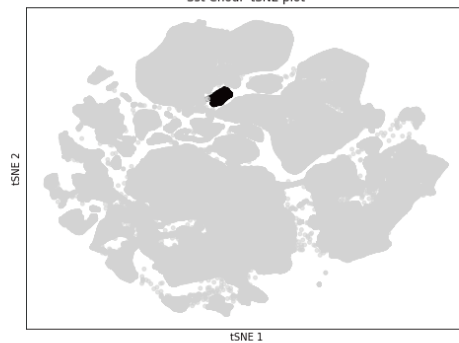

Sst tsNE plot

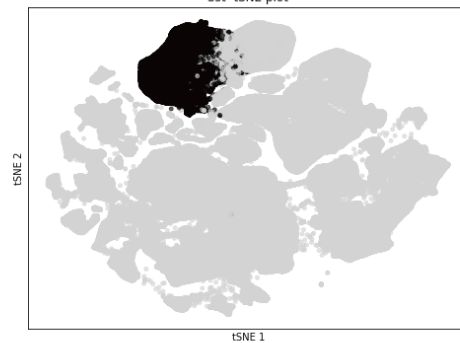

SUB-ProS tsNE plot

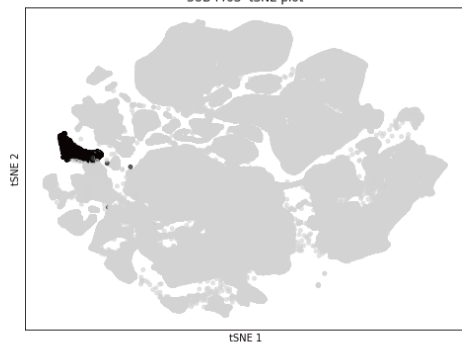

Vip tsNE plot

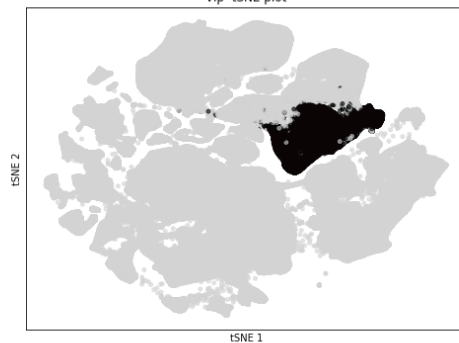

VLMC tsNE plot

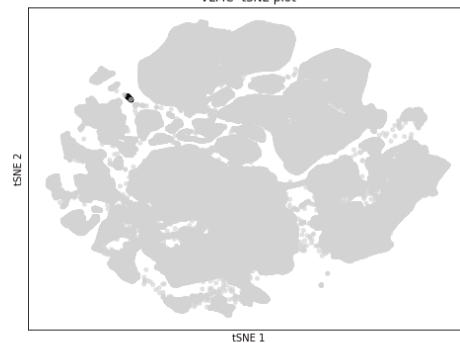

**Supplementary Figure 2 | Distribution of each subclass of cells illustrated on tSNE plot.**

Each point represents an individual cell, and cells are color-coded according to their respective subclass. One specific subclass is highlighted in black for emphasis.

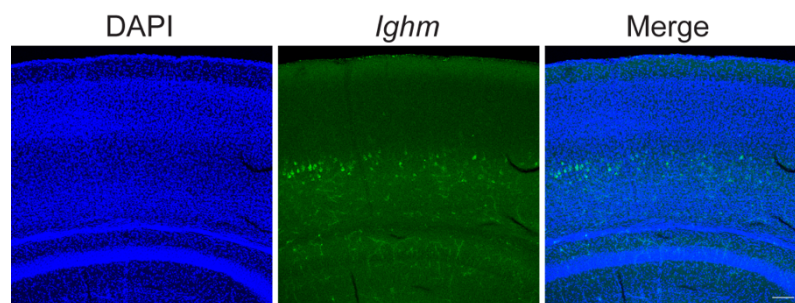

**Supplementary Figure 3 | *In situ* hybridization for *Ighm* in P14 cerebral cortex.**

A. *In situ* hybridization for *Ighm* on a section of cerebral cortex from P14 mouse. Scale bar = 100  $\mu\text{m}$ . n = 2 brains.

**Supplemental Table 1 | Details of Ig related genes expression in E16.0-E18.0 scRNA-seq data**

**Supplemental Table 2 | Details of Ig related genes expression in P0 scRNA-seq data**

**Supplemental Table 3 | Details of Ig related genes expression in adult scRNA-seq data**

**Supplemental Table 4 | Percentage of Ig related genes expression related to Figure 4**
